# Supplementary material for: Compositionally engineered Cd–Mo–Se alloyed QDs toward photocatalytic H2O2 production and Cr(vi) reduction with a detailed mechanism and influencing parameters
Source: Royal Society of Chemistry journal article supplement (doi:10.1039/d3dt02555a), 2023-01-01
Supplement: d3dt02555a1.pdf [file d3dt02555a1.pdf]

**Electronic Supporting Information**  
**Compositional Engineered Cd-Mo-Se Alloyed QDs toward**  
**Photocatalytic H<sub>2</sub>O<sub>2</sub> Production and Cr (VI) Reduction with Detailed**  
**Mechanism and Influencing Parameters**

Jyotirmayee Sahu, Sriram Mansingh, Bhagyashree Priyadarshini Mishra, Deeptimayee Prusty, and  
Kulamani Parida\*

Centre for Nanoscience and Nanotechnology, Siksha 'O' Anusnadhan (Deemed to be  
University), Bhubaneswar-751030, Odisha (India)

\*Corresponding author

E-mail: [paridakulamani@yahoo.com](mailto:paridakulamani@yahoo.com) &

[kulamaniparida@soa.ac.in](mailto:kulamaniparida@soa.ac.in)

---

## **Characterization:**

### **Physical characterizations:**

To investigate the crystallographic structure and phase purity of the synthesized sample X-ray diffraction (XRD) pattern was collected on a Rigaku Miniflex Ultima IV with Cu K $\alpha$  radiation (power rating: 100mA, 40kV, and  $\lambda=1.54\text{\AA}$ ). The morphological analysis of the as-synthesized photocatalysts was carried out by using HR-TEM 300 kV of model Tecnai G2, F30 for the HRTEM study. UV-Vis diffuse reflectance spectroscopy was obtained using a JASCO-V-750 UV-visible spectrophotometer. Photoluminescence (PL) spectroscopy was used to investigate the recombination rate and separation efficiency of quantum dots at ambient temperature using a JASCO FP-8300 spectrofluorometer with an excitation wavelength of 380 nm. The surface chemistry and elemental composition of the photocatalysts are examined by XPS using a Karto axis ultra-x-ray photoelectron spectrometer, which is equipped with a monochromatized X-ray source (Al K $\alpha$ ). Photoelectrochemical measurements, using an IVIUMSTAT multichannel workstation were performed where a conventional three-electrode Pyrex cell with Pt and Ag/AgCl respectively as counter and reference electrodes. An electrophoretic deposition (EPD) method was employed to prepare a working electrode, in which photocatalysts were deposited on Fluorine doped tin oxide (FTO). Typically, in a beaker, 20 mg of photocatalyst with 20 mL of acetone and iodine were taken and then the solution was dispersed by sonication for 10 min. In the above well-dispersed solution two parallel FTOs (separated by 10-15 mm) were dipped, and under controlled potentiostatic condition, 60 V bias was subjected (5 min) to coat the FTO surface by the photocatalyst as a thin film in 1 cm<sup>2</sup> area. The photocatalyst was deposited on FTOs and kept in the oven for 6 h to remove impurities from the FTO surface. Linear sweep voltammetry (LSV) was executed at a scan rate of 25 mV/s applying a potential of 0 to -0.8 V. Electrochemical impedance spectroscopy was also performed at zero biased potential at frequencies 10<sup>-1</sup> to 10<sup>5</sup> Hz. In dark conditions, the Mott-Schottky analysis was also carried out. All the above electrochemical analyses were carried out using 0.1 M Na<sub>2</sub>SO<sub>4</sub> solution.

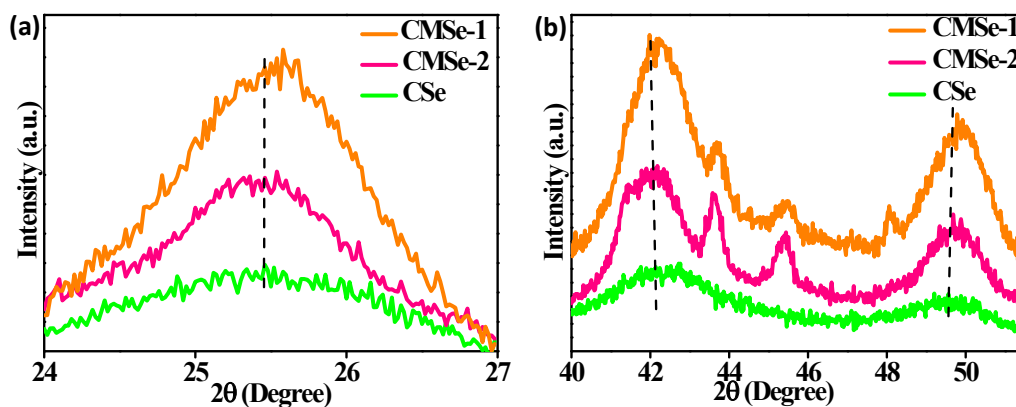

**Figure S1.** Enlarged view of XRD of CMSe-1 and CMSe-2 concerning binary CdSe QD to show shifting (a) at 25.5° and (b) at around 42 ° and 49°.

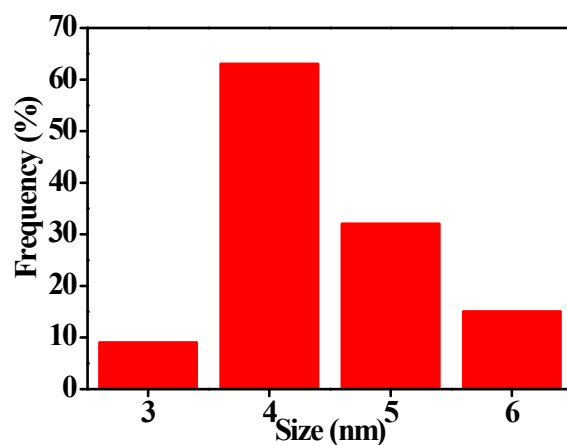

**Figure S2.** Particle size distribution of CMSe-1 QDs.

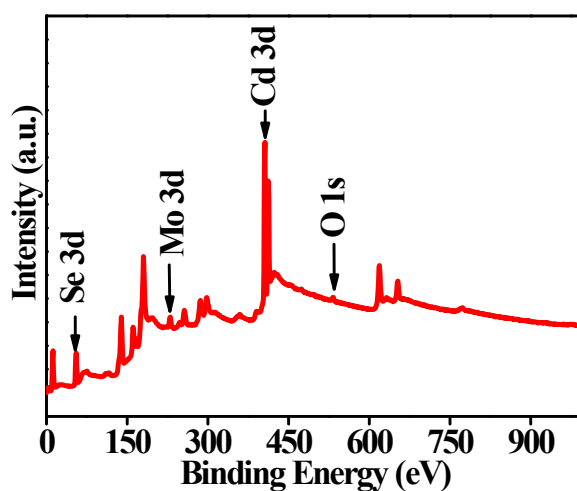

**Figure S3.** XPS survey of CMSe-1.

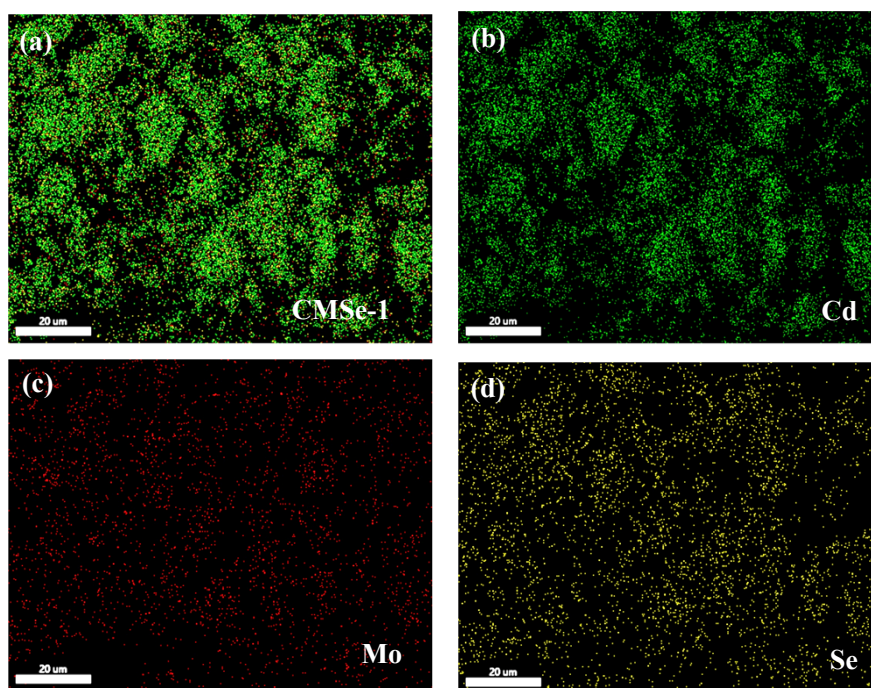

**Figure S4.** Elemental colour mapping image of (a) CMSe-1, (b) Cd, (c) Mo, and (d) Se elements.

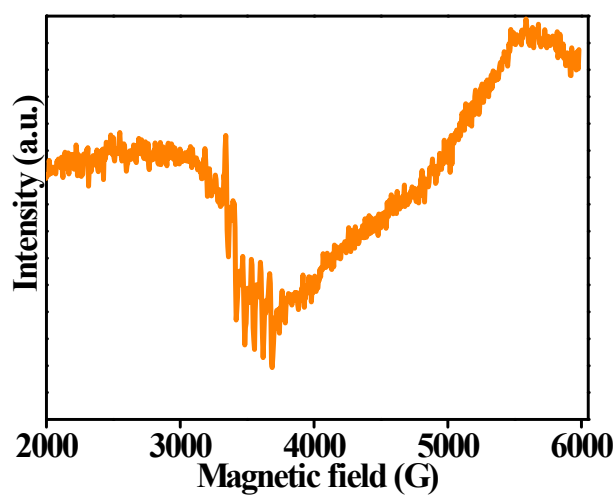

**Figure S5.** EPR spectra of CMSe-1

**Table S1.** Biexponential-Curve-Fitted TRPL parameters of CMSe-1 and CMSe-2 QD.

| Photocatalyst | $\alpha_1$ | $\tau_1$ (ns) | $\alpha_2$ | $\tau_2$ (ns) | $\tau_{\text{avg}}$ (ns) |
|---------------|------------|---------------|------------|---------------|--------------------------|
| CMSe-1        | -205.6427  | 1             | 230.8681   | 1.1           | 1.53                     |
| CMSe-2        | -81.4482   | 1             | 91.8009    | 1.1           | 1.51                     |

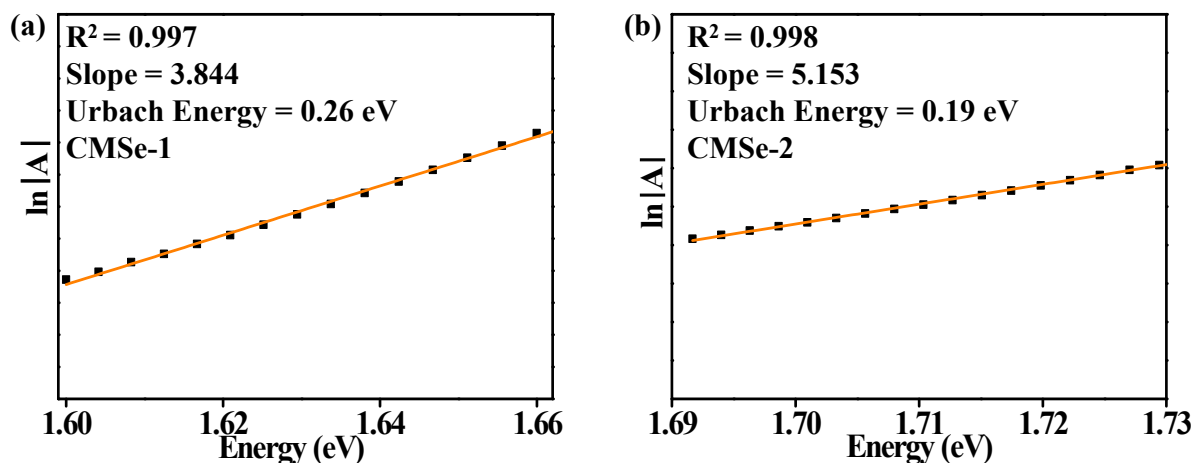

**Figure S6.** Urbach energy of (a) CMSe-1, and (b) CMSe-2 QD.

### Calculation of solar to chemical conversion efficiency (SCC %)

SCC % of CMSe-1 QDs towards  $H_2O_2$  production under 250 W Hg-lamp can be calculated by following the equation below:

$$SCC = \frac{\Delta G^\circ \text{ for } H_2O_2 \text{ Production} \times H_2O_2 \text{ produced (mol)}}{\text{Input energy (W)} \times \text{reaction time (sec)}} \times 100 \quad S1$$

Furthermore,  $\Delta G^\circ$  for  $H_2O_2$  evolution is  $117 \text{ kJ.mol}^{-1}$ . The irradiance of 250 W Hg-lamp is  $1.33 \text{ W.cm}^{-2}$  and  $127.2 \text{ cm}^2$  irradiated area. In a 1 h of reaction time, the amount of  $H_2O_2$  produced is  $28.06 \text{ }\mu\text{mol}$ .

$$\begin{aligned} \text{Input energy (W)} &= \text{irradiance (Wcm}^{-2}) \times \text{irradiated area (cm}^2) \\ &= 1.33 \times 127.2 \\ &= 169.14 \end{aligned}$$

According to equation (1), the SCC efficiency is determined to be 0.27%.

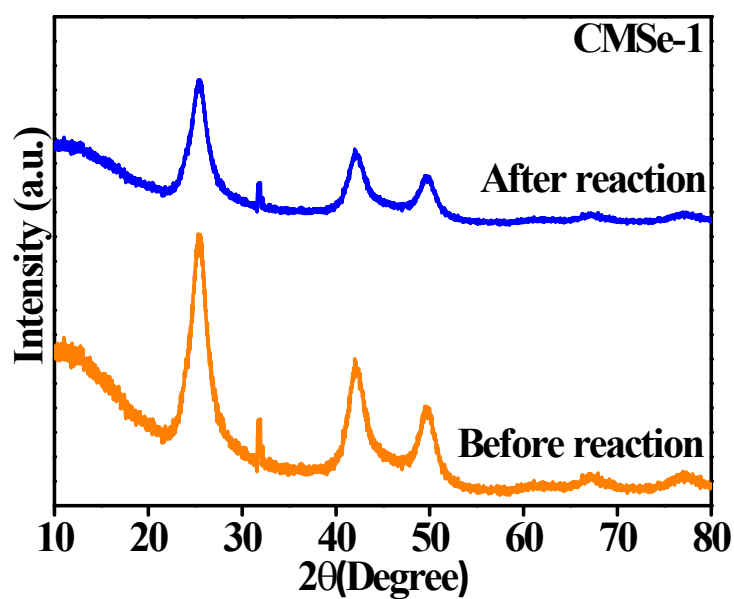

**Figure S7.** Powder XRD of CMSe-1 after performing photocatalytic activity.

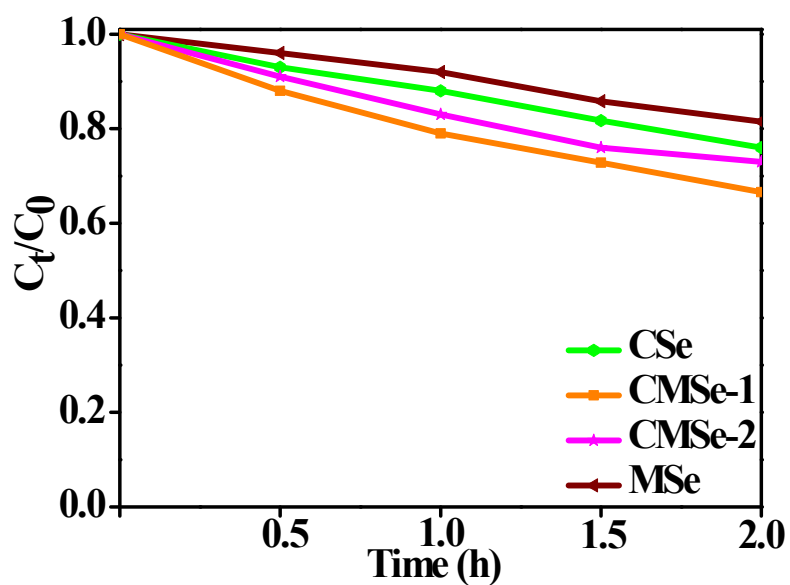

**Figure S8.** Photocatalytic decomposition of  $\text{H}_2\text{O}_2$  by CMSe-1, CMSe-2, CSe, and MSe under visible light irradiation.

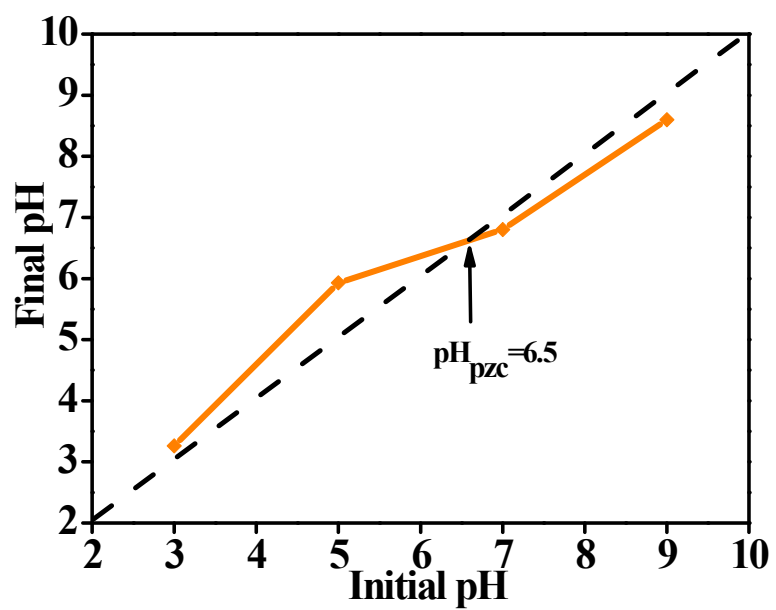

**Figure S9.** The  $\text{pH}_{\text{pzc}}$  value of CMSe-1 QD.

**Figure S10.** NBT test for detection of superoxide radicals of CMSe-1 and CMSe-2 QDs.

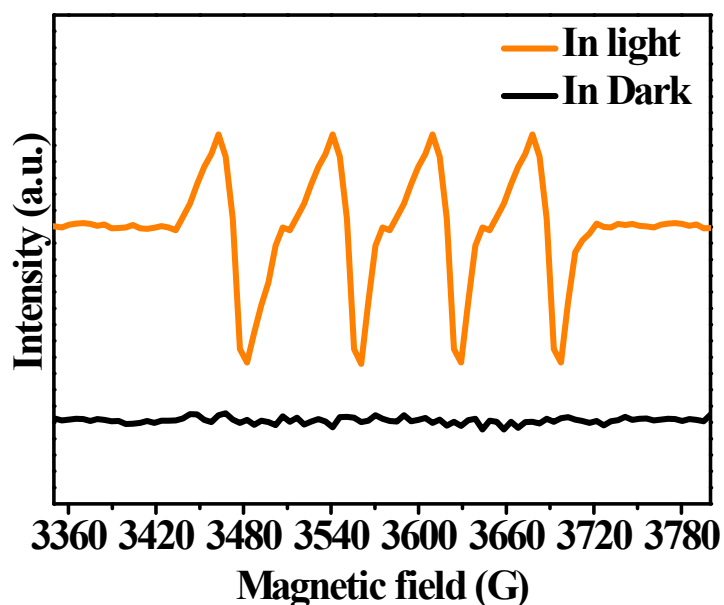

**Figure S11.** DMPO-ESR spin trapping spectra of CMSe-1 for detection of superoxide radical ( $\cdot\text{O}_2^-$ )

**Table S2.** Comparison Study on  $\text{H}_2\text{O}_2$  Production and Cr (VI) Reduction over other photocatalysts.

| Photocatalyst                                  | Rate Of $\text{H}_2\text{O}_2$ production          | Efficiency of Cr (VI) reduction | Ref.      |
|------------------------------------------------|----------------------------------------------------|---------------------------------|-----------|
| $\text{CdSe}_{550}/5\text{CdS}/2\text{ZnS}$ QD | $126 \text{ mmolL}^{-1}$ in 2 hours                | -                               | 1         |
| CdSe QD/KPN-HCP                                | $900 \text{ } \mu\text{mol g}^{-1}$ in 1hour       | -                               | 2         |
| CdSe/Se/BiOBr                                  | $4180 \text{ } \mu\text{mol L}^{-1}$ in 4h         | -                               | 3         |
| $\text{CdS}/\text{Ti}_3\text{C}_2\text{T}_x$   | $401 \text{ } \mu\text{mol L}^{-1}$ within 1 h     |                                 | 4         |
| $\text{ZnS}/\text{ZnSe}/\text{MoSe}_2$         | -                                                  | 96 % for 1.5 h                  | 5         |
| $\text{MoS}_2\text{-PVP}$                      | -                                                  | 99.5 % for 3 h                  | 6         |
| CQD/ $\text{MoSe}_2$                           | -                                                  | 99% for 3 h                     | 7         |
| $\text{CdS}/\text{Bi}_2\text{MoO}_6$           | -                                                  | 97% for 1 h                     | 8         |
| CMSe-1                                         | $1403.5 \text{ } \mu\text{molg}^{-1}\text{h}^{-1}$ | 93.6% in 2 hours                | This work |

#### References:

1. W. Ji, Z. Xu, S. Zhang, Y. Li, Z. Bao, Z. Zhao, L. Xie, X. Zhong, Z. Wei and J. Wang, , *Catal. Sci. Technol.*, 2022, **12**, 2865-2871.
2. J. Xu, Q. Ji, Y. Wang, C. Wang and L. Wang, *Chem. Eng. J.*, 2021, **426**, 130808.
3. C. Du, S. Nie, C. Zhang, T. Wang, S. Wang, J. Zhang, C. Yu, Z. Lu, S. Dong, J. Feng and H. Liu, *J. Colloid Interface Sci.*, 2022, **606**,1715-1728.



4. Z. Yang and J. Wang, *ACS Appl. Nano Mater.*, 2022, **6**, 558-572.
5. L. Qiu, Y. Wang, X. Zhang, F. Tian, C. Zhu, J. Sheng, W. Yang and Y. Yu, *ACS Appl. Nano Mater.*, 2022, **6**, 523-532.
6. Y. Zhang, H. Li, X. Zhang, H. Zhang, W. Zhang, H. Huang, H. Ou and Y. Zhang, *J. Colloid Interface Sci.*, 2023, **630**, 742-753.
7. Z. Ren, X. Liu, H. Chu, H. Yu, Y. Xu, W. Zheng, W. Lei, P. Chen, J. Li and C. Li, *J. Colloid Interface Sci.*, 2017, **488**, 190-195.
8. D. Kandi, S. Martha, A. Thirumurugan and K. M. Parida, *ACS Omega*, 2017, **2**, 9040-9056.
